# Supplementary material for: Large size nitrogen-doped graphene-coated graphite for high performance lithium-ion battery anode
Source: Royal Society of Chemistry journal article supplement (doi:10.1039/c6ra23228k), 2016-01-01
Supplement: c6ra23228k2.pdf [file c6ra23228k2.pdf]

## Supporting Information

### **Large size nitrogen-doped graphene-coated graphite for high performance lithium-ion battery anode**

Xiaoxu Liu, Erjia Liu, Dongliang Chao, Liang Chen, Shikun Liu, Jing Wang, YaoLi, Jiupeng Zhao, Yong-Mook Kang, Zexiang Shen

#### **Electrochemical measurements**

The electrochemical tests were carried out using a coin-type cell (CR 2032). For LGAs and pure N-doped graphene electrodes, the working electrodes were prepared by mixing 90wt% active material, 5wt% acetylene black, and 5 wt% polyvinylidene fluoride binder dissolved in N-methyl-2-pyrrolidinone. After coating the above slurries on Cu foils, the electrodes were dried at 80°C in a vacuum for 2 h to remove the solvent before pressing. Then, the electrodes were cut into disks (diameter of 12 mm) and dried at 100°C for 24 h in a vacuum. The mass of the LGA composite electrode was ~3 mg. The battery cells were assembled in an argon-filled glove box with the metallic lithium foil as the counter electrode, 1 M LiPF<sub>6</sub> in ethylene carbonate (EC)–dimethyl carbonate (DME) (1:1 in volume) as the electrolyte, and a polypropylene (PP) film (Celgard 2400) as the separator. Full cells were fabricated by using a LiCoO<sub>2</sub> cathode and a LGA anode. The cyclic voltammetry (CV) measurements of pure graphite and LGA anode were carried out using a Solartron 1287 electrochemical workstation at a scanning rate of 0.1 mV s<sup>-1</sup>. For electrochemical impedance spectroscopy (EIS), the amplitude of the sine perturbation signal was 5 mV, and the frequency was scanned from the highest (100 kHz) to the lowest (10 mHz). Galvanostatic charge–discharge cycles were tested on a LAND CT2001A electrochemical workstation at a current density of 500 mA g<sup>-1</sup> between 0.05 and 1.5 V vs Li<sup>+</sup>/Li at room temperature.

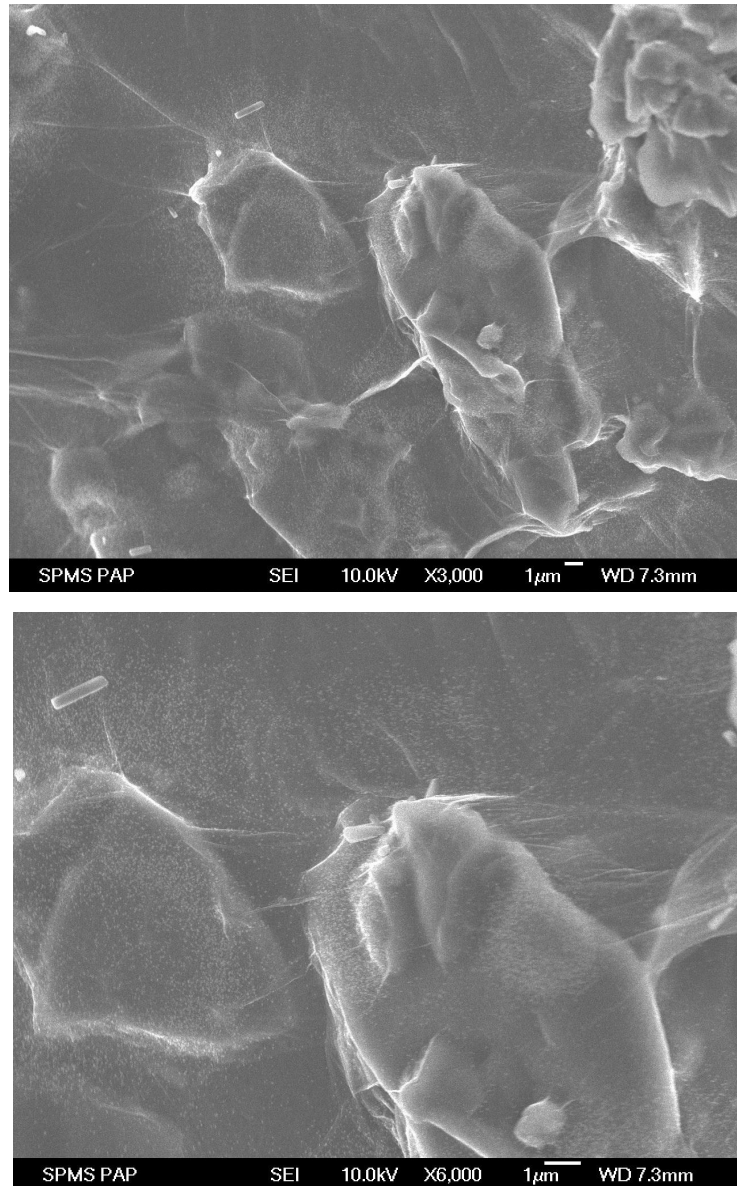

**Figure S1.**SEM images of LGA composite with 5wt% LNG measured with different magnifications.

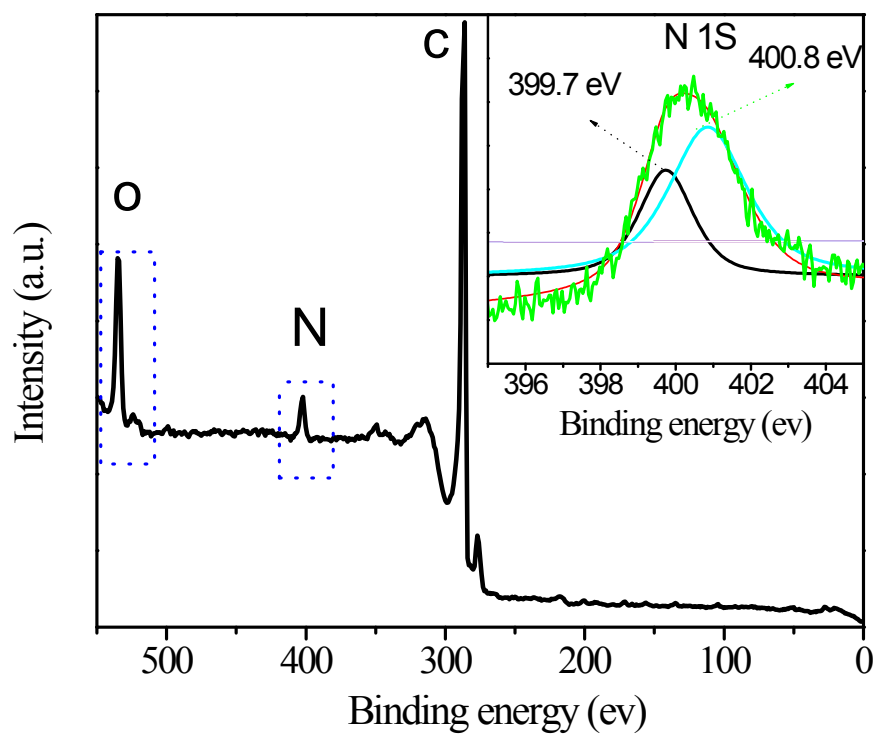

**Figure S2.** XPS spectra of a LGA anode with 1 wt% LNG

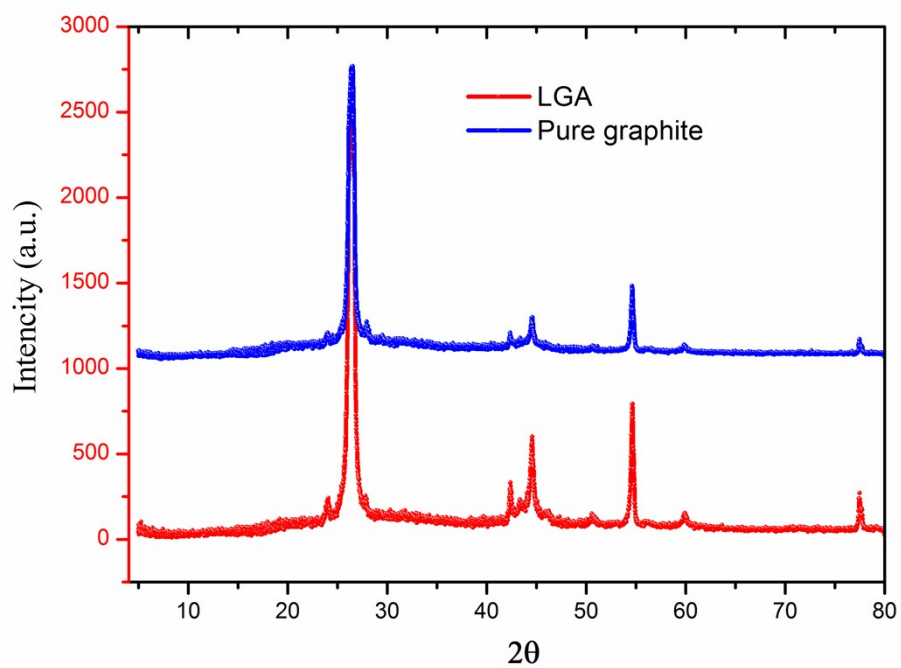

**Figure S3.** XRD patterns of the LGA and pure graphite

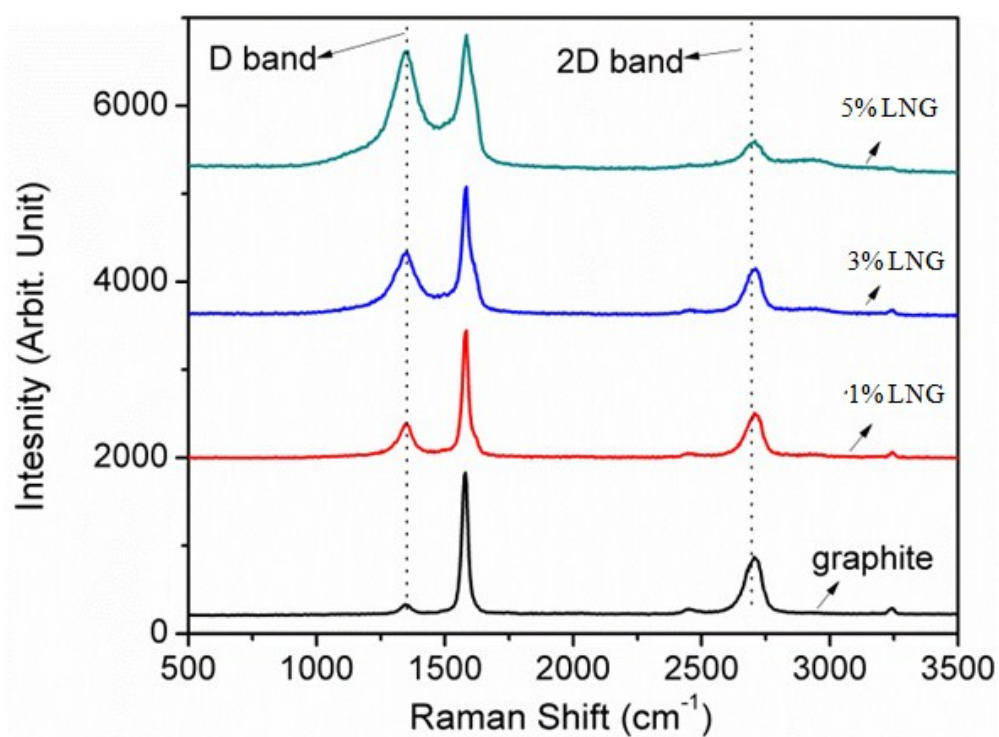

**Figure S4.** Raman spectra of LGA s with 0, 1, 3, and 5 wt% LNG contents.

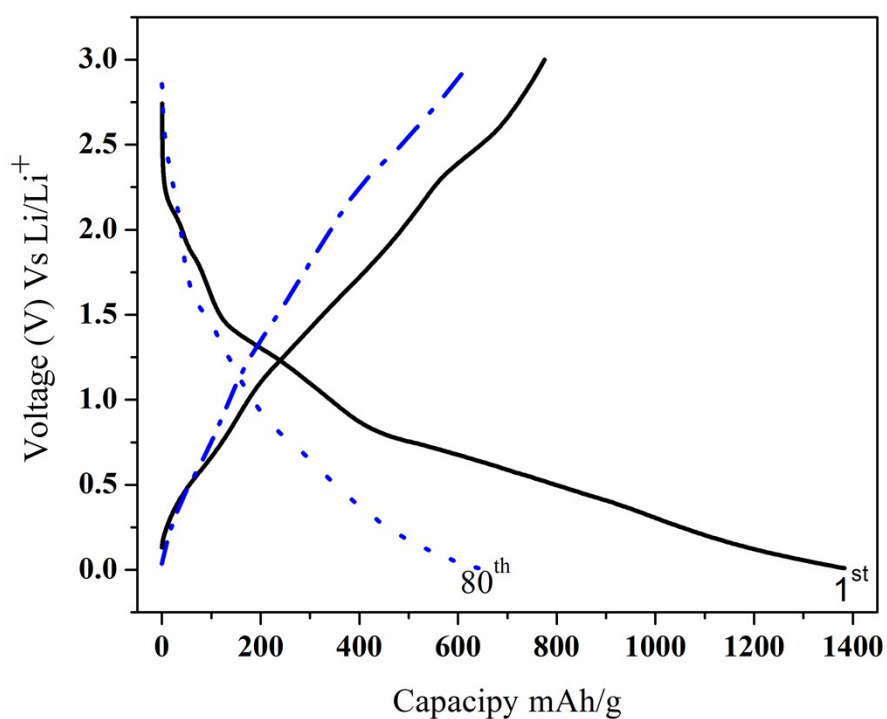

**Figure S5.** The discharge/charge curves of pure LNG

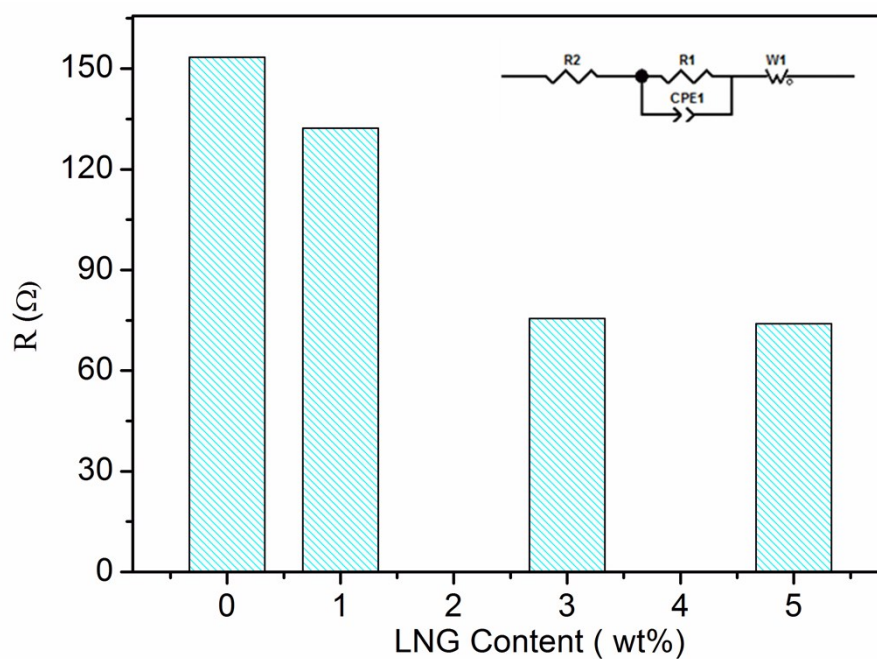

**Figure S6.** The contact impedances of LGA with 0, 1, 3, and 5% LNG

The conductivity of the LNG and a conventional reduced graphene sheets by annealing in  $H_2/Ar$  at high temperatures were tested by 4-point probe measurements. the LNG is more conductive ( $433 \text{ S cm}^{-1}$ ) than conventional reduced graphene ( $356 \text{ S cm}^{-1}$ ).

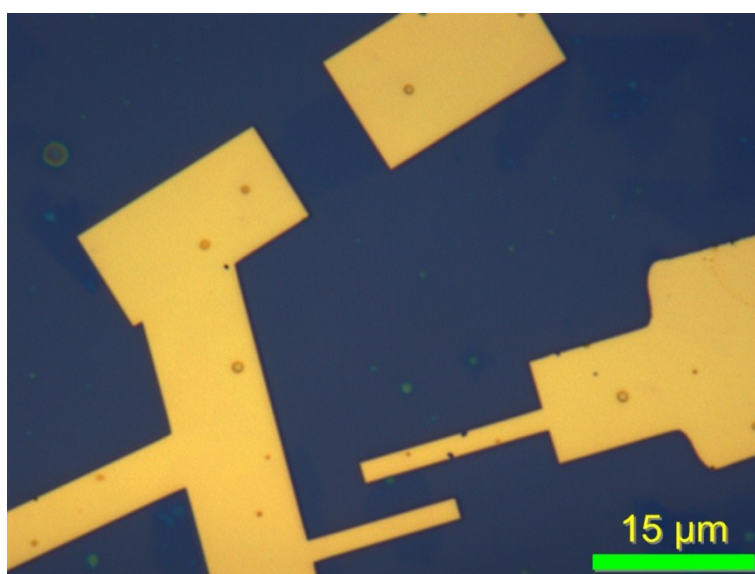

**Figure S7.** SEM image of LNG on the Si substrate for 4-point measurements

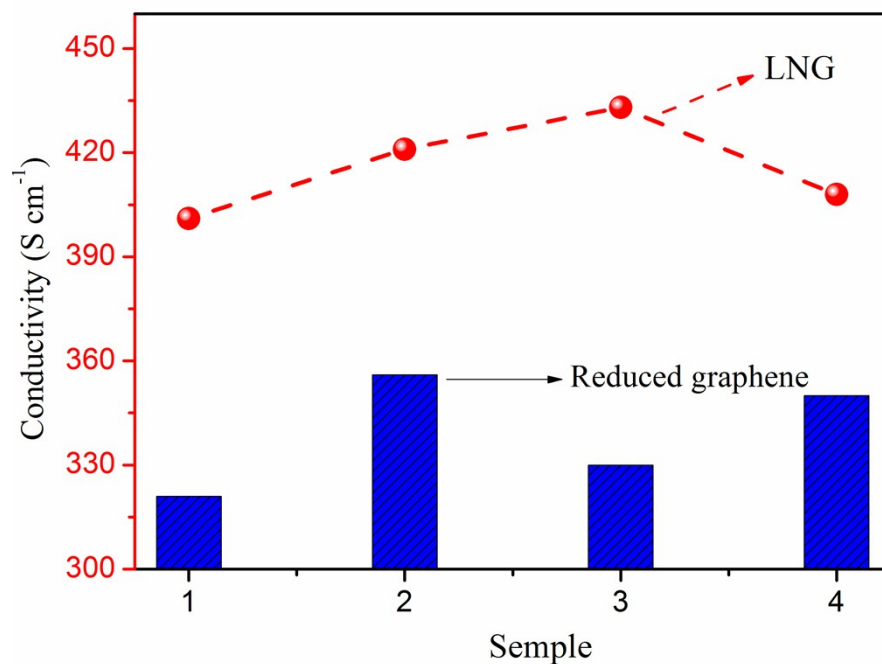

**Figure S8.** Plot of the mean conductivities for LNG and reduced graphene sheets

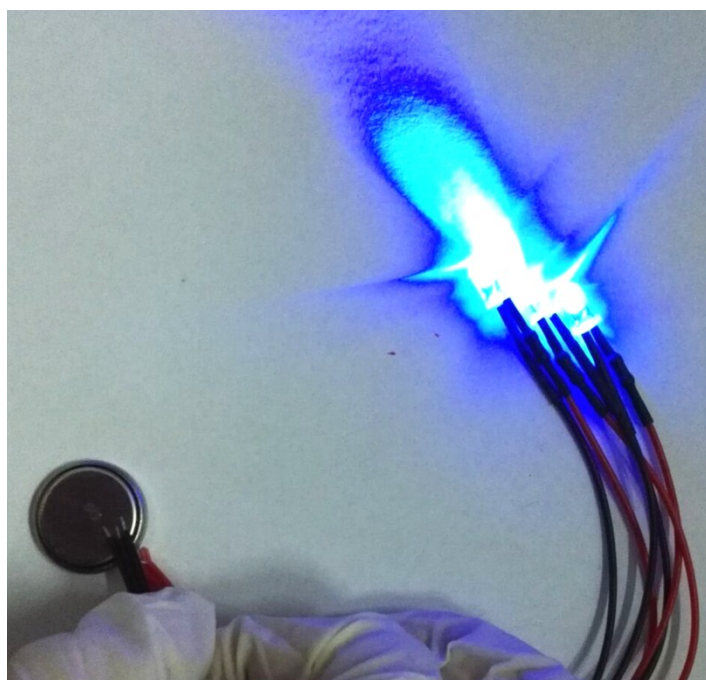

**Figure S9.** Digital photograph of LED powered by LGA/LiCoO<sub>2</sub> full cell

First, the size of the graphite particles used is  $\sim 10\text{--}100\ \mu\text{m}$ . For the ease of understanding, the graphite particles are assumed to be cubical with interparticle

spacing of  $\sim 0.33$  nm (Fig.S11), which means that a single cubical graphite particle contains about 30,000 layers of square graphene sheets with side length of about  $10\text{ }\mu\text{m}$ . Theoretically, to fully wrap a cubical graphite particles around 30 graphene sheets would be sufficient. Thus, it is expected that about 0.1 wt% of graphene can fully wrap the graphite particles and greatly improve the LGA performance. Conversely, excessive graphene can cause over-stacking and agglomeration of graphene, adversely affecting the composite properties. The above explanation is consistent with the experimental results obtained in this work, i.e., the capacity and initial Coulombic efficiency of the LGA anodes containing 5 wt% of graphene are lower than those of the LGA s containing 1 and 3 wt% of graphene. However, due to different size distributions of the graphite particles and the graphene platelets, the graphite-to-graphene ratio needs to be optimized through specific experiments in different systems, for better performance of the LGA composites.

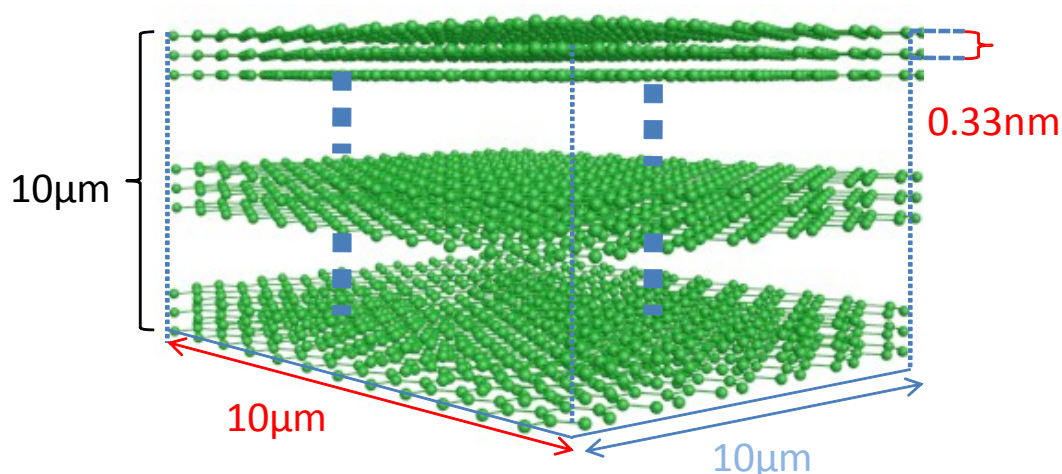

**Figure S10.** A model of cube-shaped graphite particles

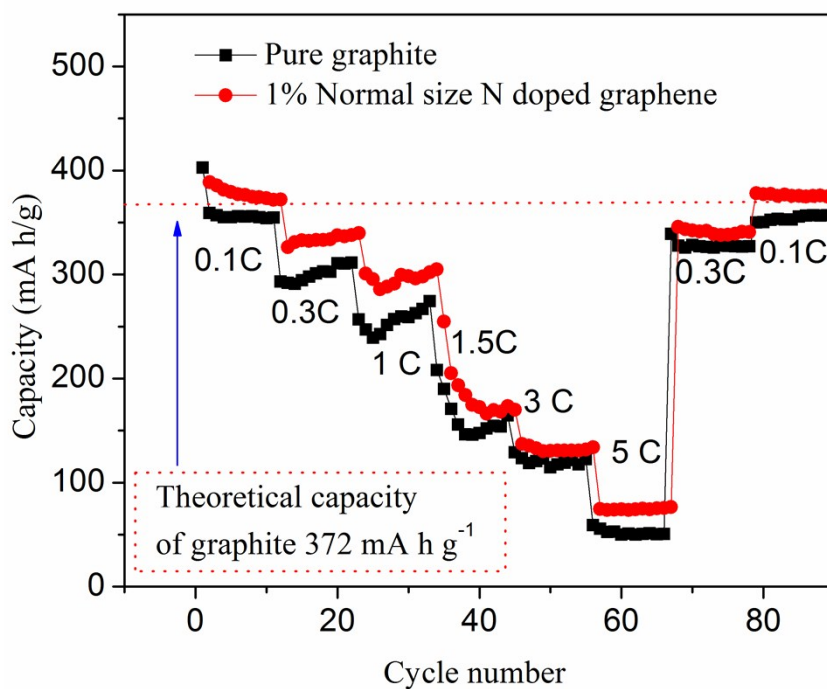

**Figure S11.** The rate capability of pure graphite and composite anode with 1 wt % normal size graphene,

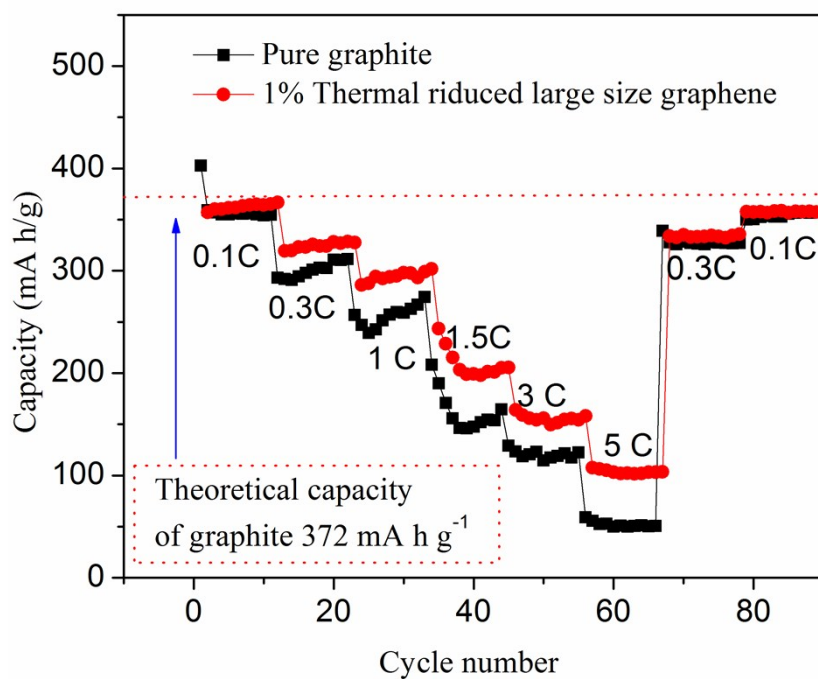

**Figure S12.** The rate capability of pure graphite and composite anode with 1 wt % thermal reduced large size graphene,

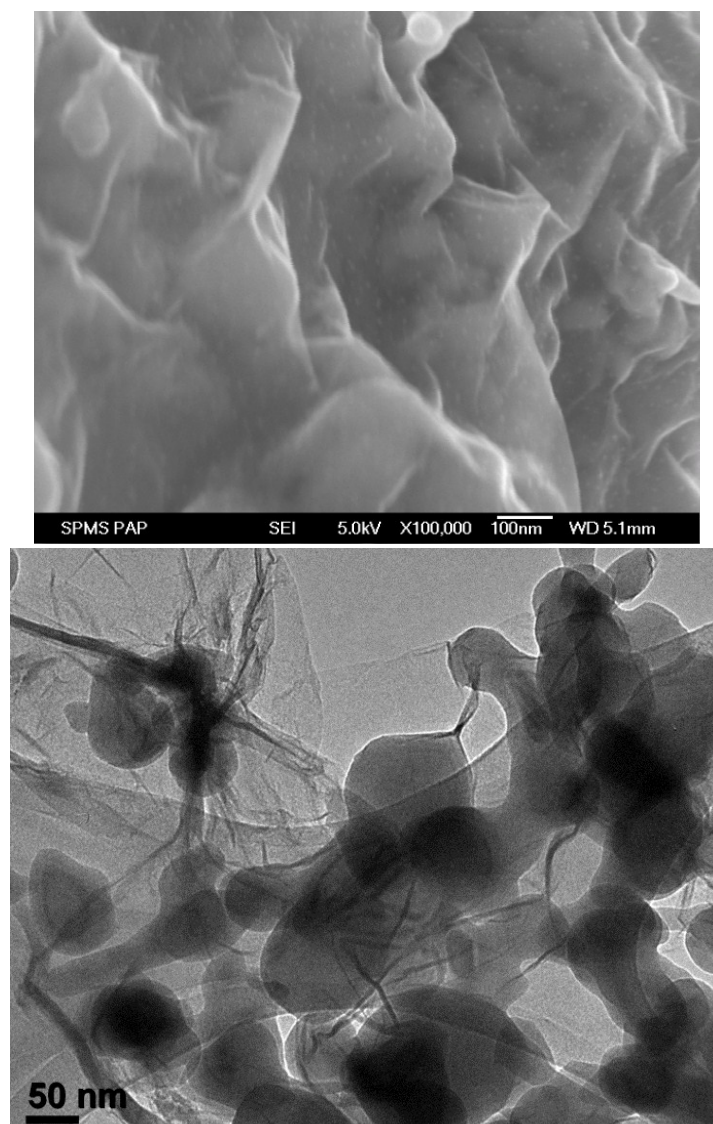

**Figure S13.** SEM and TEM images of LNG coated Si composite

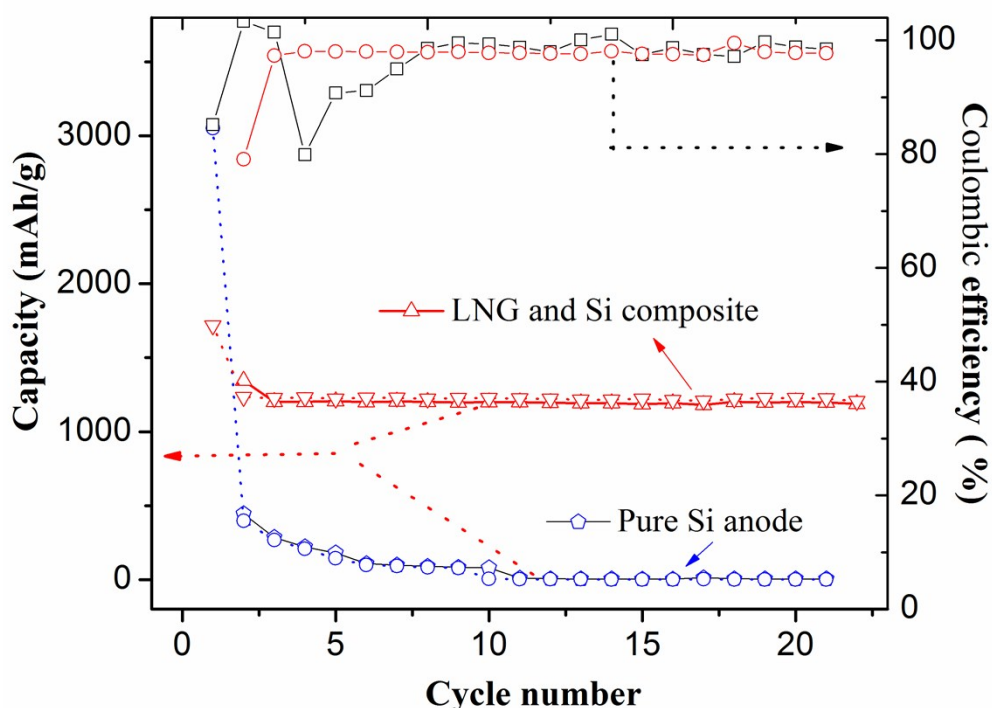

Figure S14. Cycle life test for the LIB cells on LNG coated Si anode

Table S1 A survey of electrochemical properties of surface modified graphite anode.

| Electrode description                                                    | Capacity ( $\text{mA h g}^{-1}$ ) | Cycling stability                               | Initial Coulombic efficiency | Ref.      |
|--------------------------------------------------------------------------|-----------------------------------|-------------------------------------------------|------------------------------|-----------|
| LGA                                                                      | 390 @ 0.1 C                       | 98% after 2000 cycles@ 1C                       | ~89%                         | This work |
| Alkali carbonate-coated graphite electrode                               | 350 @ 1 C                         | 50 cycles@ 1 C                                  | ~90%                         | 1         |
| Reduced graphene                                                         | 225 @ 0.13 C                      | ~95% after 100 cycles @ 0.13 C                  | 44%                          | 2         |
| carbon coating on natural graphite                                       | 348@ 0.1C                         | ----                                            | 93%                          | 3         |
| Cu coating on graphite electrode                                         | 280@ 0.25C                        | ----                                            | ~80%                         | 4         |
| $\text{Cu}_2\text{O}$ coating on graphite                                | 211@ 0.1mA $\text{cm}^{-2}$       | ----                                            | ~68%                         | 5         |
| $S_b$ -coated mesophase graphite powder                                  | 325@ 0.1mA $\text{cm}^{-2}$       | 101.2% after 20 cycles@0.325mA $\text{cm}^{-2}$ | ~89%                         | 6         |
| coating with a pyrolytic carbon shell                                    | ~345 @ 0.1C                       | 90% after 40 cycles                             | ~88%                         | 7         |
| $\text{Li}_2\text{CO}_3$ -coating on the performance of natural graphite | ~260@ 0.1mA $\text{cm}^{-2}$      | 80% after 160 cycles                            | ---                          | 8         |

|                                    |                                 |                                 |      |    |
|------------------------------------|---------------------------------|---------------------------------|------|----|
| coating of the pyrolytic carbon    | ~350@ 0.1mA<br>cm <sup>-2</sup> | 95% after 200 cycles @<br>0.5 C | ~88% | 9  |
| AlPO <sub>4</sub> Coating graphite | ~360@ 0.2C                      | 78% after 50 cycles             | ~93% | 10 |

## Reference

- 1 Komaba, S., Watanabe, M., Groult, H. & Kumagai, N. Alkali carbonate-coated graphite electrode for lithium-ion batteries. *Carbon* **46**, 1184-1193, doi:10.1016/j.carbon.2008.04.021 (2008).
- 2 Wang, G. X., Shen, X. P., Yao, J. & Park, J. Graphene nanosheets for enhanced lithium storage in lithium ion batteries. *Carbon* **47**, 2049-2053, doi:10.1016/j.carbon.2009.03.053 (2009).
- 3 Yoon-Soo Park, H. J. B., Seh-Min Oh, Yang-Kook Sun, Sung-Man Leea. Effect of carbon coating on thermal stability of natural graphite spheres used as anode materials in lithium-ion batteries. *Journal of Power Sources* (2009)–557 **190**, 5, doi:10.1016/j.jpowsour.2009.01.067 (2009).
- 4 Gao, J., Zhang, H., Zhang, T., Wu, Y. & Holze, R. Preparation of Cu coating on graphite electrode foil and its suppressive effect on PC decomposition. *Solid State Ionics* **178**, 1225-1229, doi:10.1016/j.ssi.2007.06.004 (2007).
- 5 Fu, L. J. *et al.* Effect of Cu<sub>2</sub>O coating on graphite as anode material of lithium ion battery in PC-based electrolyte. *J Power Sources* **171**, 904-907, doi:10.1016/j.jpowsour.2007.05.099 (2007).
- 6 Chang, C.-C. Sb-coated mesophase graphite powder as anode material for lithium-ion batteries. *J Power Sources* **175**, 874-880, doi:10.1016/j.jpowsour.2007.09.108 (2008).
- 7 LIU Shu-he, Y. Z., WANG Zuo-ming, LI Feng, BAI Shuo, WEN Lei, CHENG Hui-ming. Improving the electrochemical properties of natural graphite spheres by coating with a pyrolytic carbon shell. *New Carbon Mater* **23**, 30–36, doi:10.1016/S1872-5805(08)60010-4 ( 2008).
- 8 S.S. Zhang , K. X., T.R. Jow & U.S. Effect of Li<sub>2</sub>CO<sub>3</sub>-coating on the performance of natural graphite in Li-ion battery. *Electrochem Commun* **5** 979-982, doi:10.1016/j.elecom.2003.09.014 (2003).
- 9 Young-Soo Han , J.-Y. L. Improvement on the electrochemical characteristics of graphite anodes by coating of the pyrolytic carbon using tumbling chemical vapor deposition. *Electrochim Acta* **48 (2003)** 1073-1079, doi:10.1016/S0013-4686(02)00845-9 (2008).
- 10 Sang-Eun Lee, E. K., and Jaephil Choc. Improvement of Electrochemical Properties of Natural Graphite Anode Materials with an Ovoid Morphology by AlPO<sub>4</sub> Coating. *Electrochemical and Solid-State Letters* **10**, A1-A4 doi:10.1149/1.2364308 (2007).
